# Supplementary material for: Socially-mediated arousal and contagion within domestic chick broods
Source: PubMed Central journal article supplement (PMC6043517; doi:10.1038/s41598-018-28923-8), 2018-07-12
Supplement: 41598_2018_28923_MOESM1_ESM.pdf [file 41598_2018_28923_MOESM1_ESM.pdf]

1                   **Socially-mediated arousal and contagion within domestic chick broods**

2                   **Joanne L. Edgar<sup>1</sup> and Christine J. Nicol<sup>2</sup>**

3                   <sup>1</sup>Bristol Veterinary School, University of Bristol, Langford House, Langford, BS40 5DU, UK

4                   <sup>2</sup>Royal Veterinary College, Hawkshead Lane, North Mimms, Herts, AL9 7TA, UK

5  
6                   Corresponding author: j.edgar@bristol.ac.uk

7  
8                   **Supplementary information**

9                   ***Animal and housing***

10                  19 broods of five female chicks (Lohmann classic) were each hatched under a broody hen  
11                  (Australorp x Indian game). The chicks were unrelated Lohmann classic, obtained as eggs  
12                  from a commercial hatchery and placed underneath the broody hens four days prior to  
13                  hatching. Each hen and her brood of chicks were housed in a floor pen (1.5m x 1m) which  
14                  was bedded with 5cm of wood shavings, and contained a feeder containing chick crumb and a  
15                  chick drinker, allowing *ad libitum* food and water. The temperature in the room was 20°C  
16                  and the lighting schedule was 16L: 8D. The day after hatching, chicks were individually  
17                  marked using blue and red stock marker on their back and/or tail feathers.

18                  ***Habituation to test box (Days 14-22)***

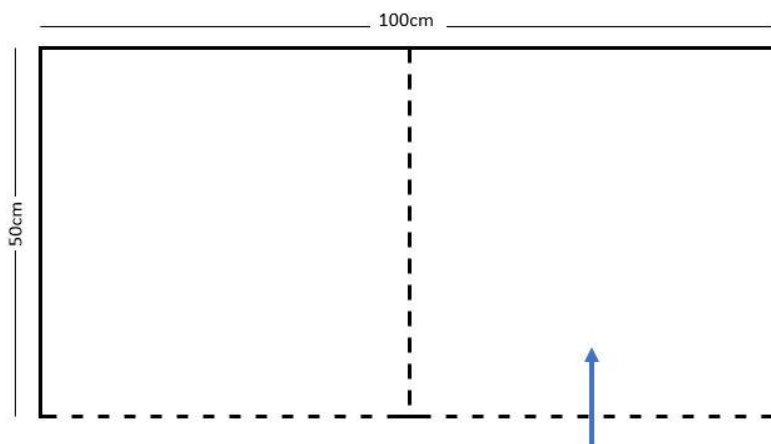

20 Fig Supp1. Test box apparatus showing the wire divider and position of air puff release  
21 during AP

22

23

24 Table Supp1. Habituation of chicks to test box

| Day of age | Habituation session | Time in box (mins) |
|------------|---------------------|--------------------|
| 14         | 1                   | 5                  |
|            | 2                   | 10                 |
| 15         | 3                   | 5                  |
|            | 4                   | 15                 |
| 17         | 5                   | 20                 |
| 21         | 6                   | 20                 |
| 22         | 7                   | 25                 |

25

26 From days 20 to 22, chicks were exposed to the sight of a thermal video camera positioned on  
27 a tripod 1m from the test box.

28 ***Days 23-65***

29 Immediately following habituation, the chicks experienced a further four 25-minute periods  
30 together as a brood in the observer box over 2 days, including two 10-minute exposures to air  
31 puffs (for 1s every 30s). After this, the chicks were handled weekly to obtain information on  
32 weight and physical health. On day 56, to coincide with the natural cessation of maternal  
33 care, the broody hens were removed from the pens and were rehomed.

34 Table Supp2. Behavioural ethogram

| Behaviour | Description                                                                                                         |
|-----------|---------------------------------------------------------------------------------------------------------------------|
| Stand     | Chick in upright posture with legs extended, without performing any other described behaviour                       |
| Sit       | Chick with legs bent underneath body and breast against the floor, without performing any other described behaviour |
| Preen     | Chick using beak to manipulate their own feathers                                                                   |

|                     |                                                                                                       |
|---------------------|-------------------------------------------------------------------------------------------------------|
| Ground peck/scratch | Chick using beak to manipulate the ground and/or using digging motion with legs                       |
| Walk                | Chick moving around the test box in upright posture, without performing any other described behaviour |
| Freeze              | Standing with eyes open and no body or head movement for at least five seconds                        |

35

36

37
